# Supplementary material for: New MT2 Melatonin Receptor-Selective Ligands: Agonists and Partial Agonists
Source: MDPI journal article supplement (doi:10.3390/ijms18071347), 2017-06-23
Supplement: s1 [file s1]

## Supplementary Materials

The characterizations of the molecules were done by mass spectrometry and NMR on the following instruments: 3100 series Waters mass spectrometer (Waters, Ma, USA) and a Bruker NMR AV300 instrument. The crude data are presented as figures in which the spectrum of the given compound is shown. All the mass spectra fitted the molecular masses expected for the compounds, and all the NMR spectra fitted the expected structures.

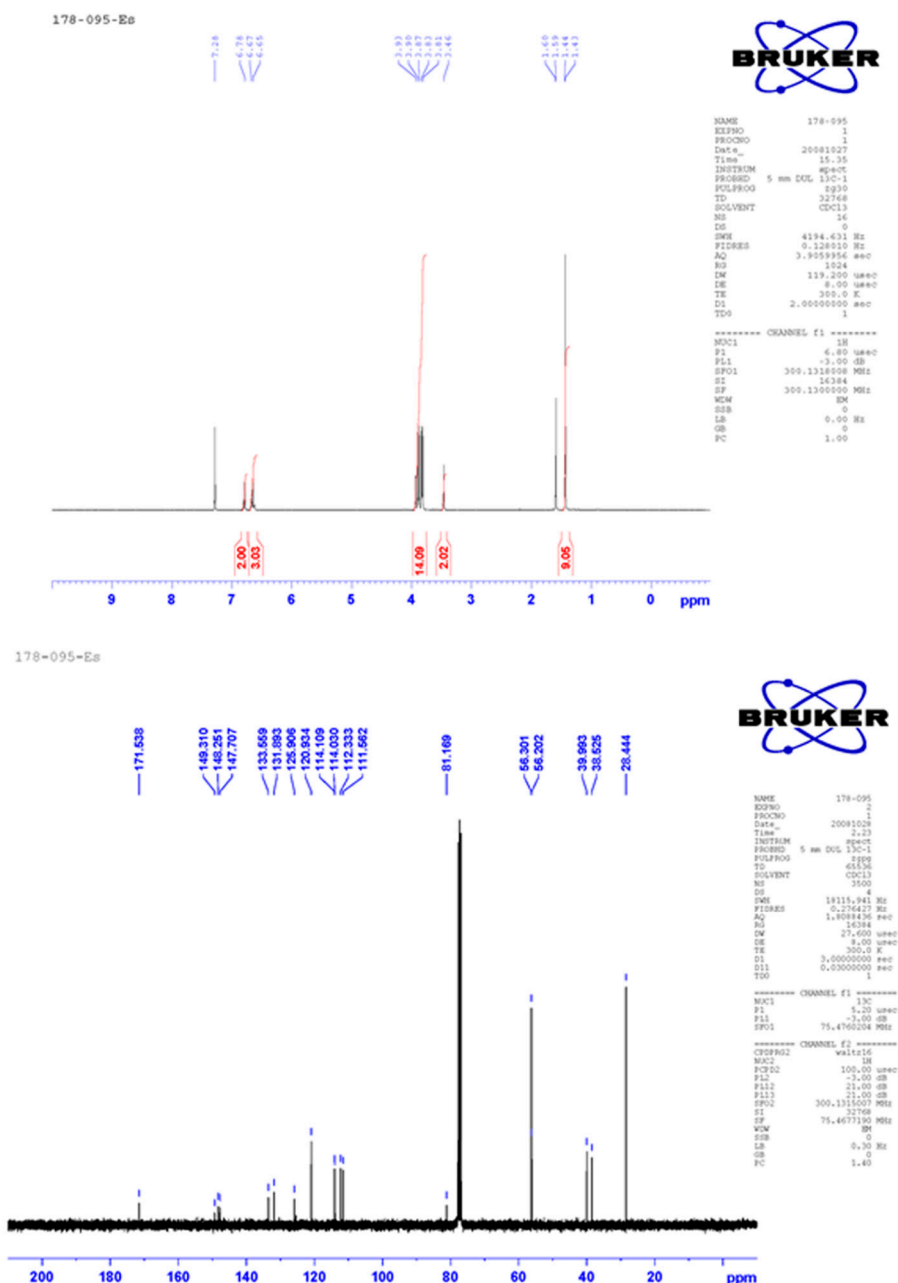

Supplementary Figure 1:  $^1\text{H}$  (top) and  $^{13}\text{C}$  (bottom) NMR spectra of DIV4288

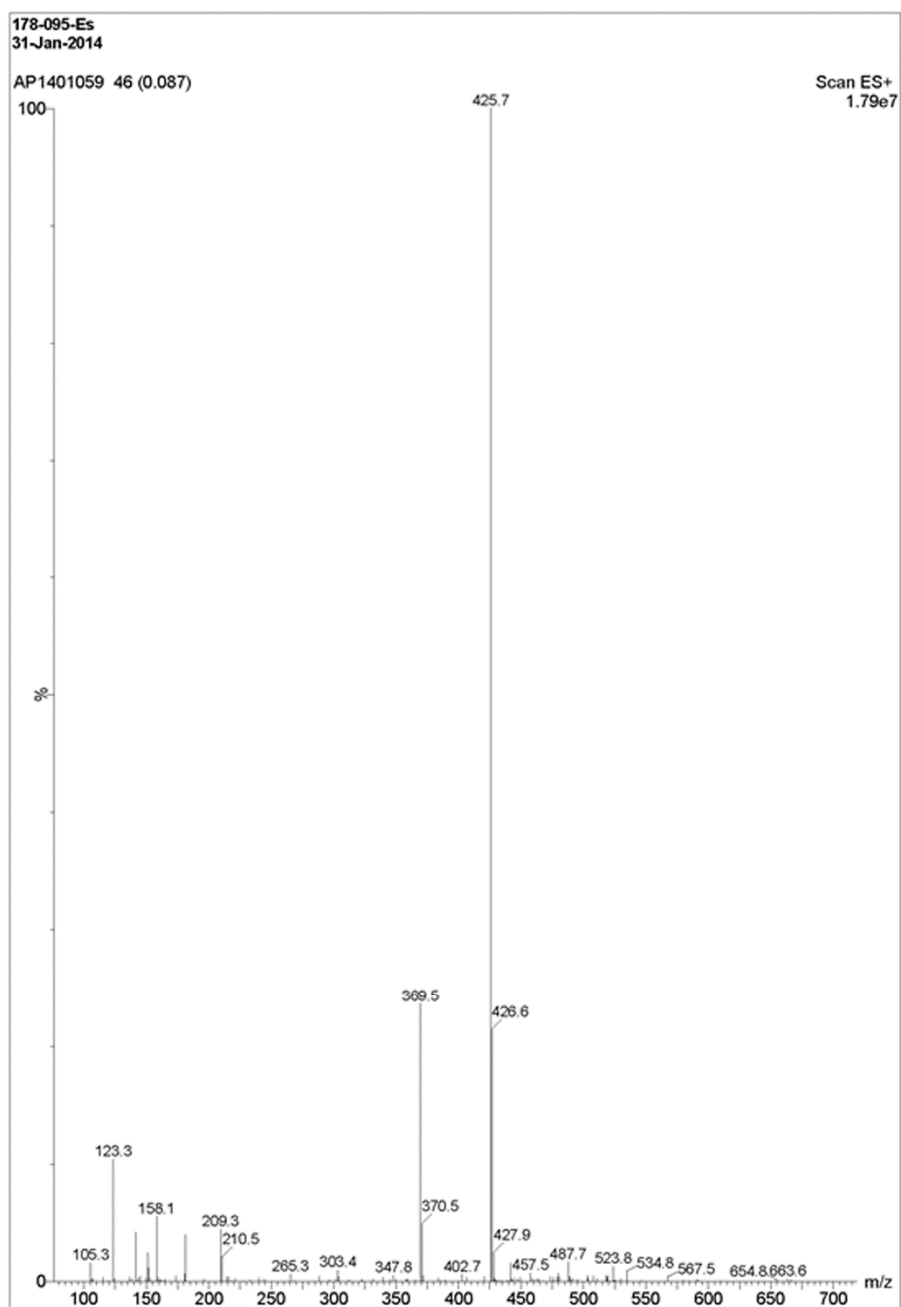

## Supplementary Figure 2

Supplementary Figure 2: Mass spectrometry spectrum of DIV4288

377-068-C2C3

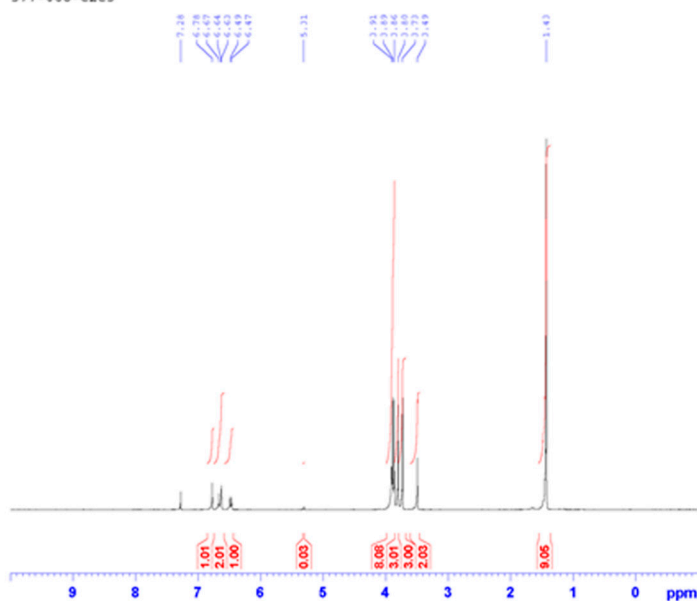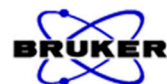

```

NAME      377-068
EXPNO     5
PROCNO    1
Date_     20140204
Time      14.54
INSTRUM   spect
PROBHD    5 mm DCL 13C-1
PULPROG   zgpg30
TD         32768
SOLVENT   CDCl3
NS         14
DS         0
SWH        4194.631 Hz
FIDRES     0.126019 Hz
AQ         3.9059956 sec
RG         256
DW         119.250 usec
DE         8.00 usec
TE         300.0 K
D1         2.00000000 sec
TD0        1

===== CHANNEL f1 =====
NUC1       13C
P1         8.70 usec
PL1        -3.00 dB
SFO1       100.1310000 MHz
SI         16384
SF         100.1310000 MHz
WDW         EM
SSB         0
LB         0.00 Hz
GB         0
PC         1.00
  
```

377-068-C2C3

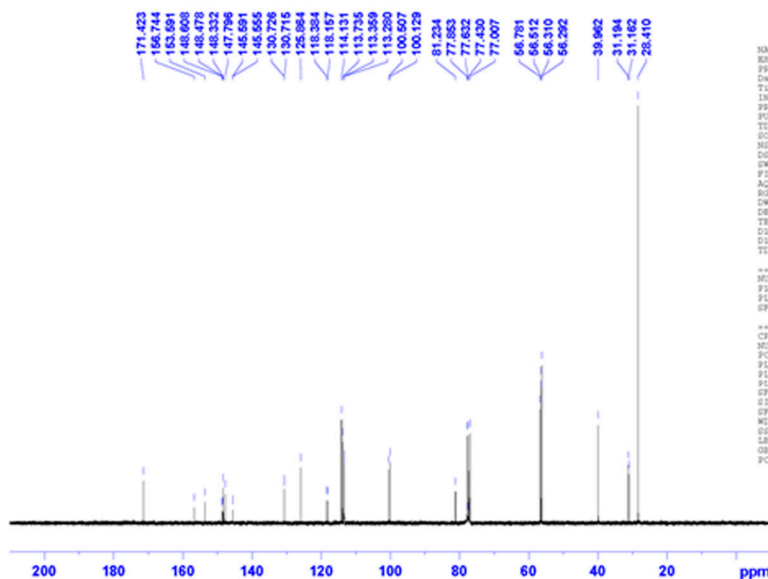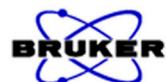

```

NAME      377-068
EXPNO     4
PROCNO    1
Date_     20140205
Time      4.13
INSTRUM   spect
PROBHD    5 mm DCL 13C-1
PULPROG   zgpg30
TD         65536
SOLVENT   CDCl3
NS         1024
DS         4
SWH        18115.941 Hz
FIDRES     0.276427 Hz
AQ         1.8588436 sec
RG         24384
DW         27.4500 usec
DE         8.00 usec
TE         300.0 K
D1         3.00000000 sec
D11        0.03000000 sec
TD0        1

===== CHANNEL f1 =====
NUC1       13C
P1         5.10 usec
PL1        -3.00 dB
SFO1       75.4763204 MHz

===== CHANNEL f2 =====
CPCPGPG2  waltz16
NUC2       1H
PCPG2     100.00 usec
PL2        -3.00 dB
PL12       19.00 dB
PL13       19.00 dB
SFO2       300.1325007 MHz
SI         32768
SF         75.4677180 MHz
WDW         EM
SSB         0
LB         0.30 Hz
GB         0
PC         1.40
  
```

Supplementary Figure 3

Supplementary Figure 3:  $^1\text{H}$  (top) and  $^{13}\text{C}$  (bottom) NMR spectra of DIV6518

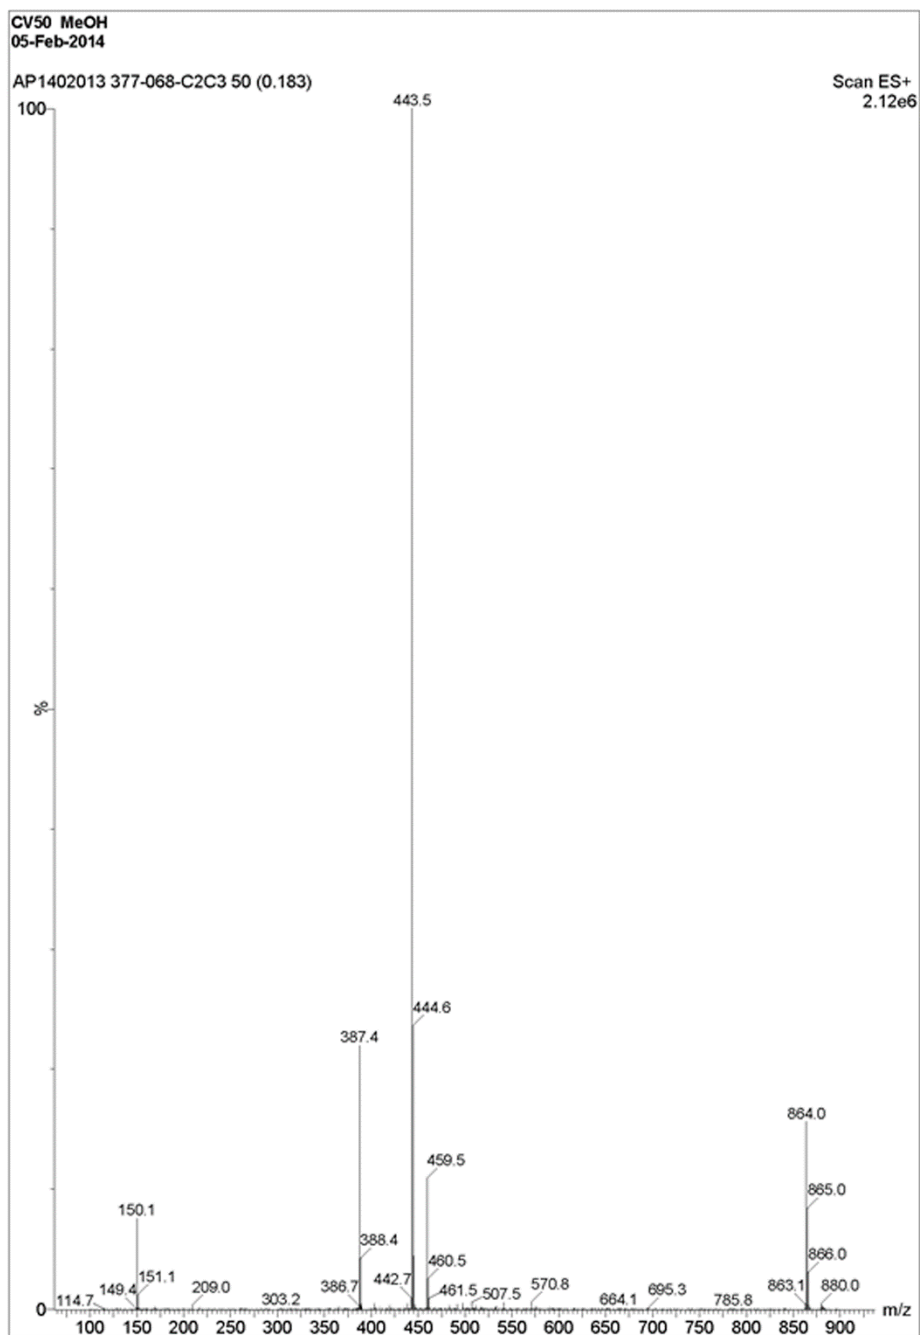

Supplementary Figure 4

Supplementary Figure 4: Mass spectrometry spectrum of DIV6518

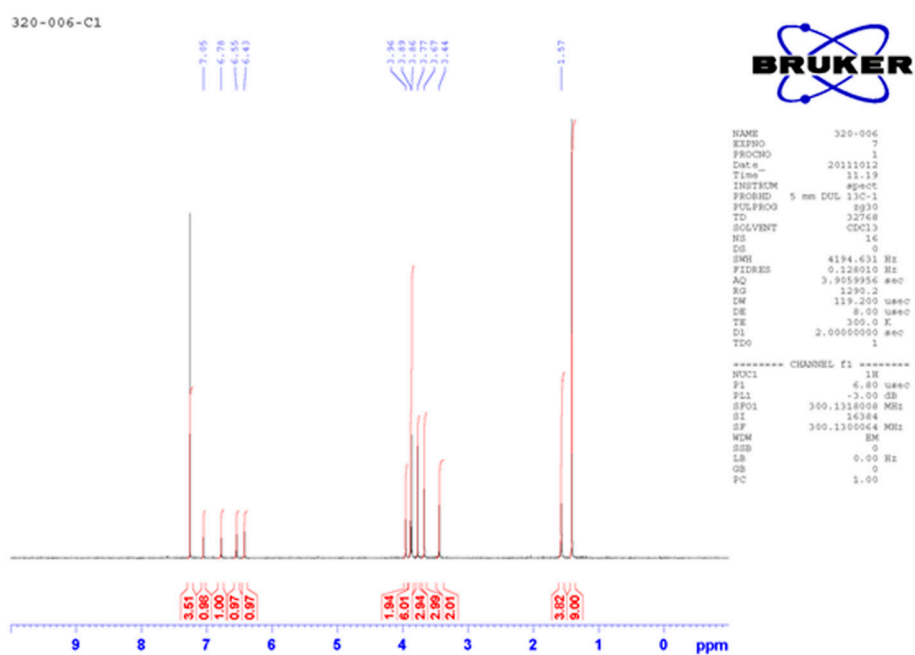

Supplementary Figure 5

Supplementary Figure 5:  $^1\text{H}$  NMR spectra of DIV0879

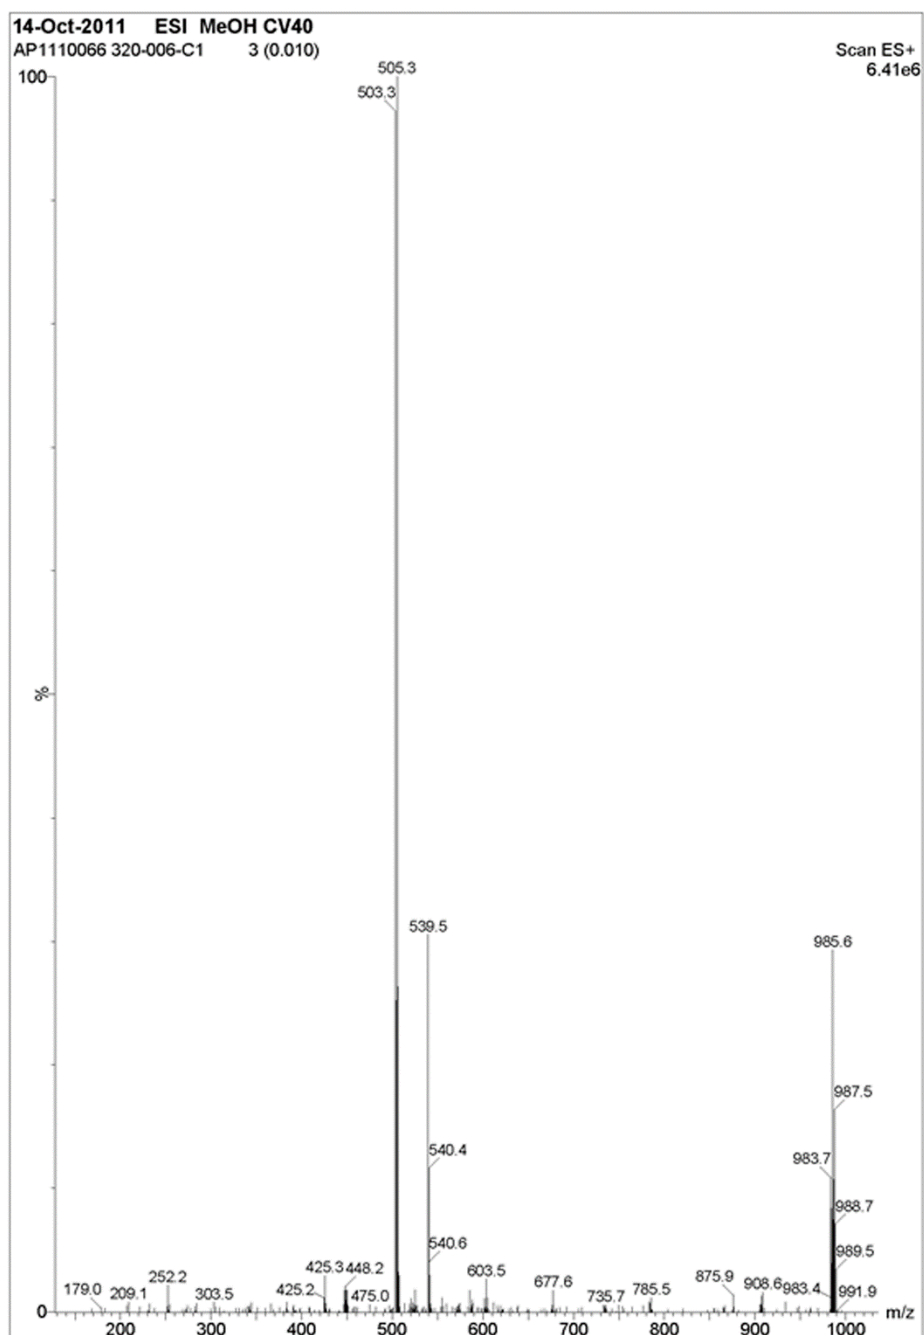

Supplementary Figure 6

Supplementary Figure 6: Mass spectrometry spectrum of DIV0879

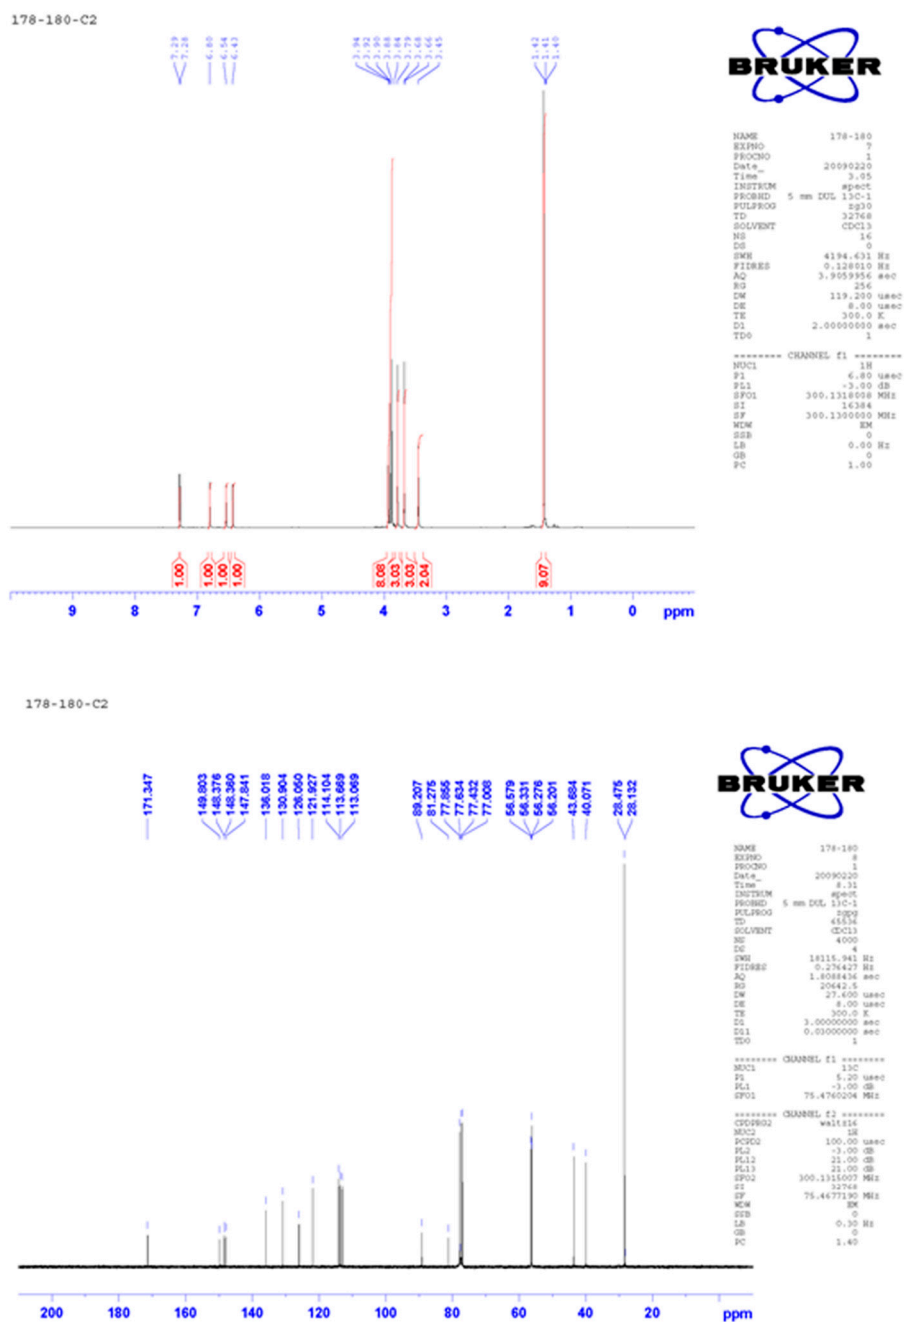

Supplementary Figure 7

Supplementary Figure 7:  $^1\text{H}$  (top) and  $^{13}\text{C}$  (bottom) NMR spectra of DIV0880

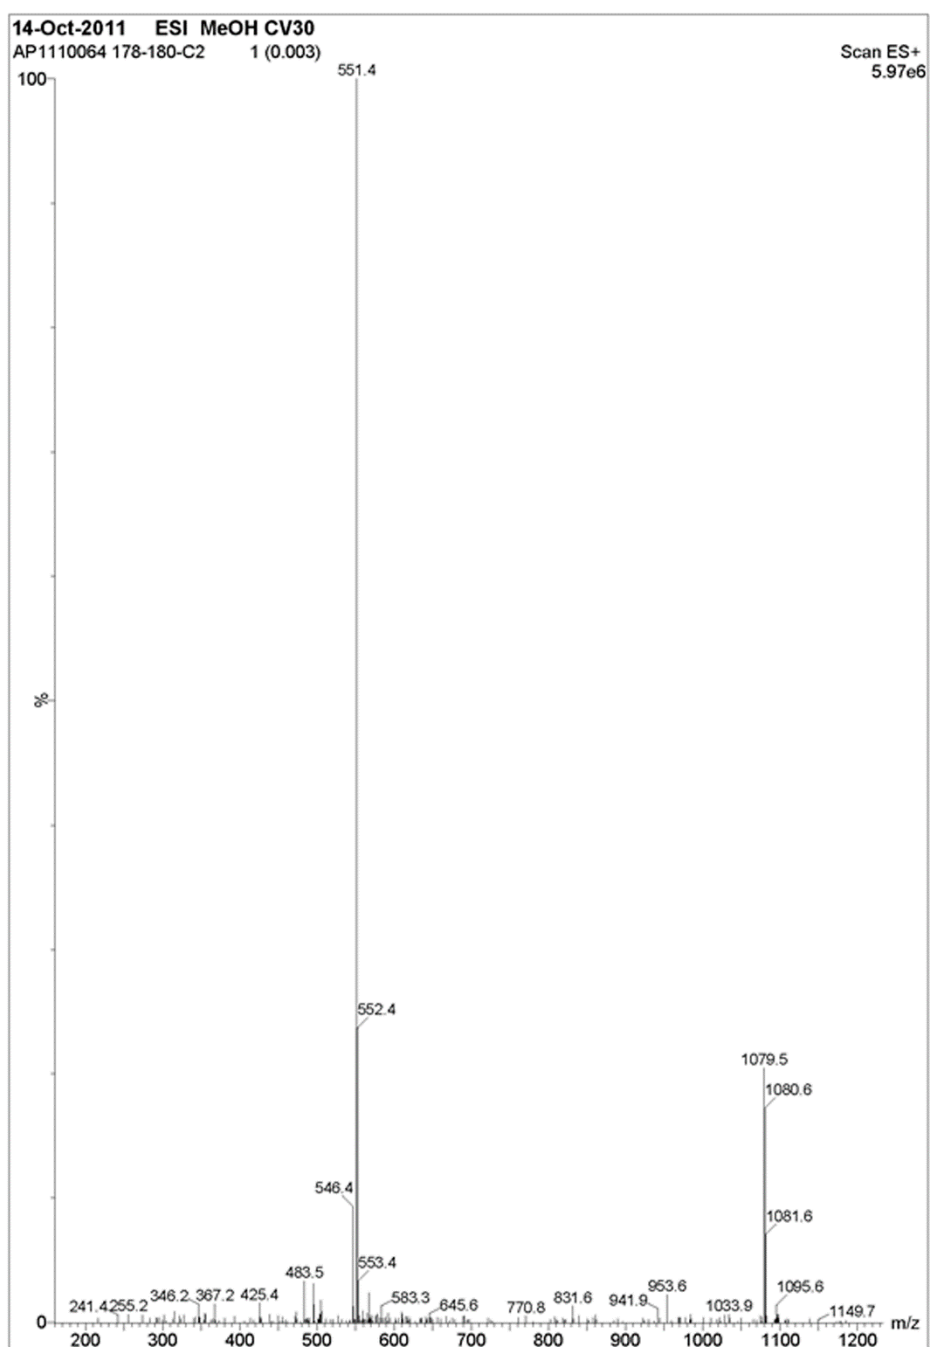

Supplementary Figure 8

Supplementary Figure 8: Mass spectrometry spectrum of DIV0880



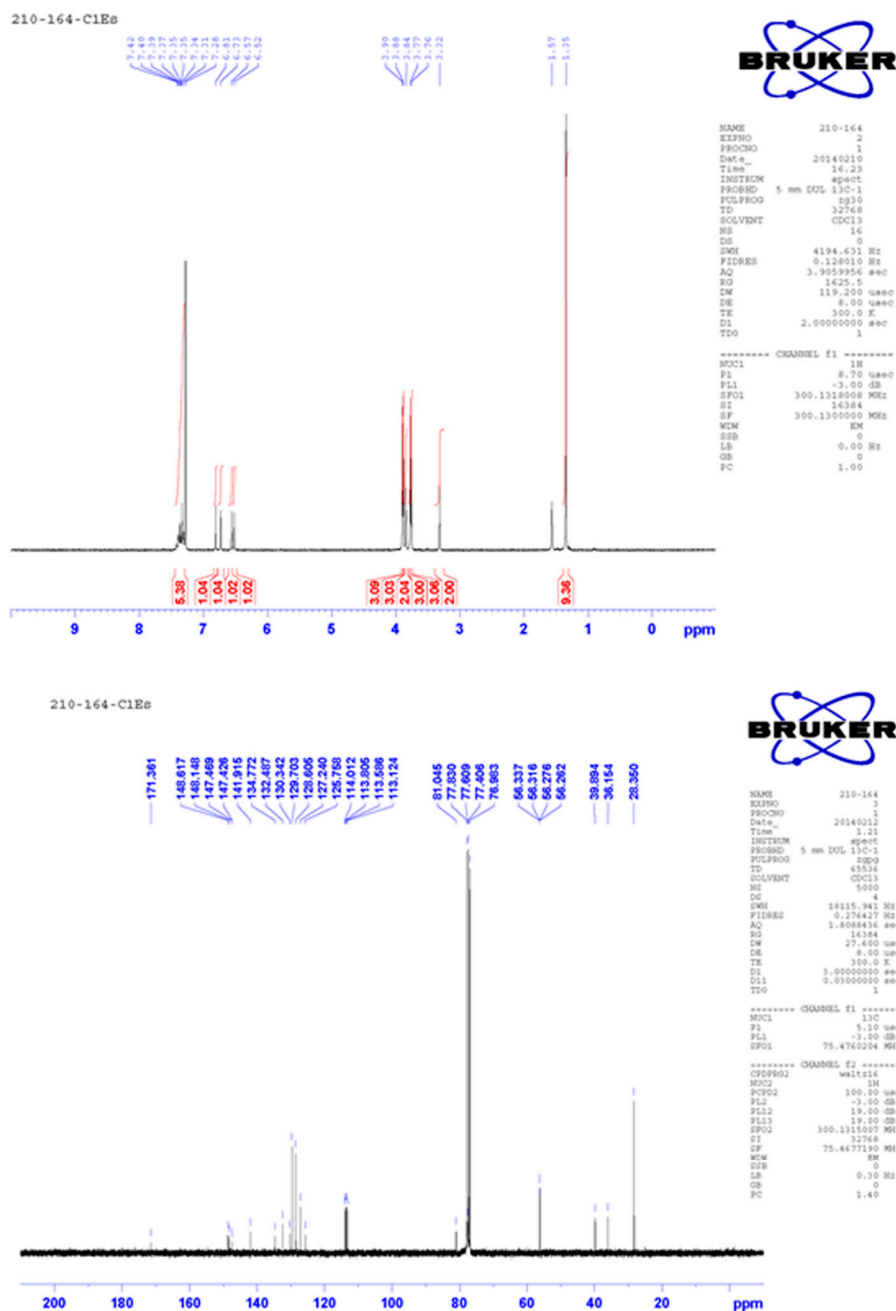

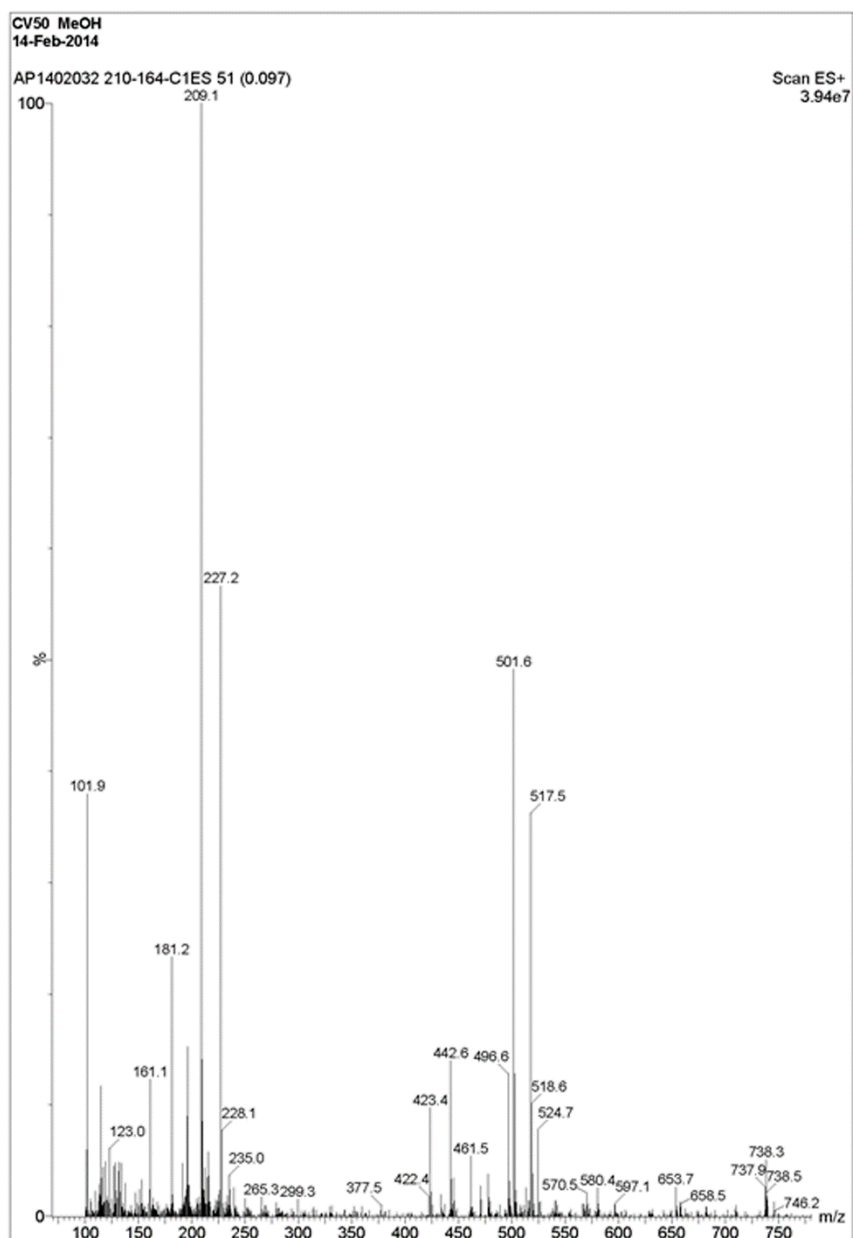

Supplementary Figure 10

Supplementary Figure 10: Mass spectrometry spectrum of DIV6519

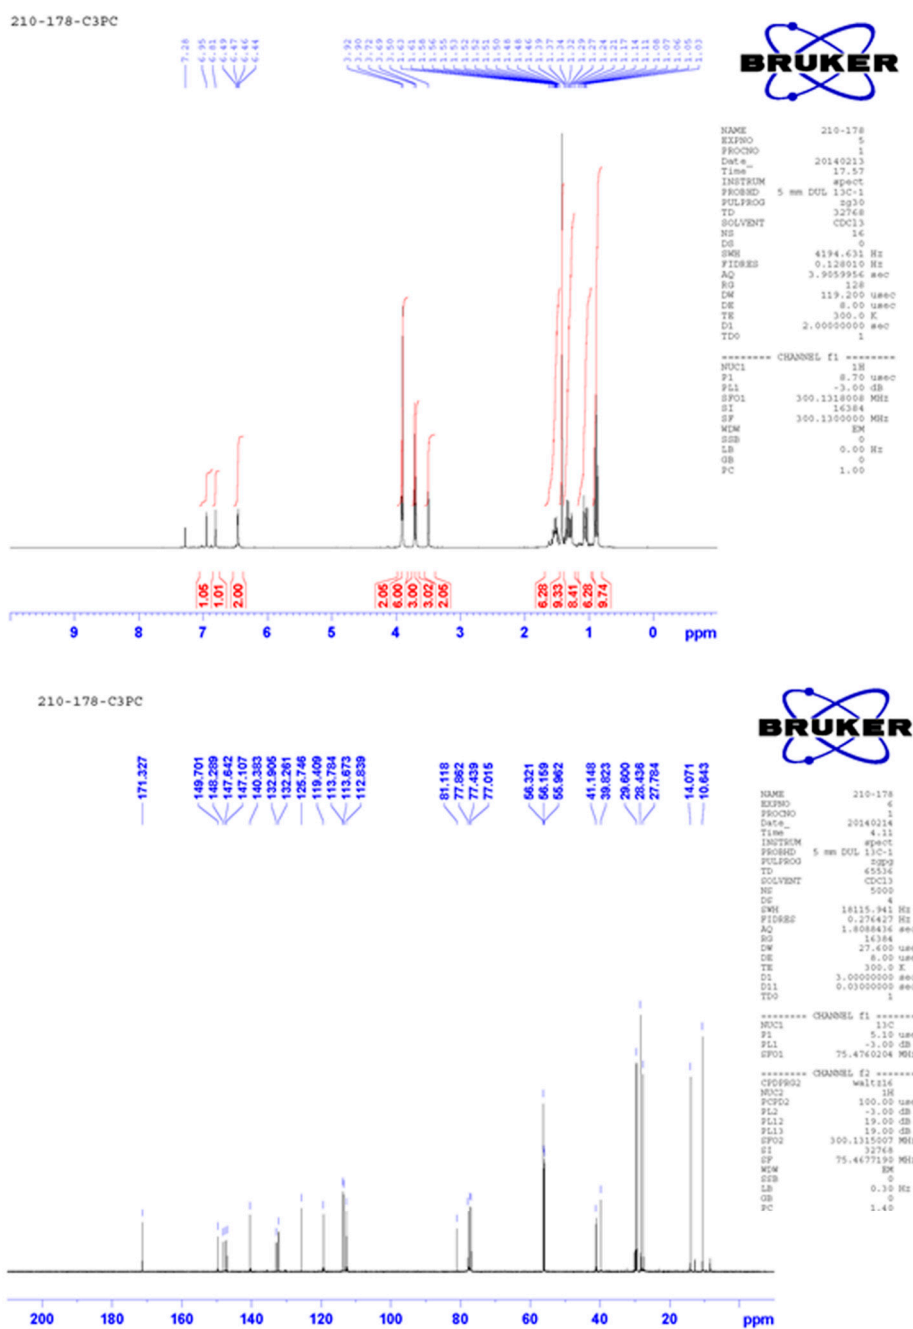

Supplementary Figure 11

Supplementary Figure 11:  $^1\text{H}$  (top) and  $^{13}\text{C}$  (bottom) NMR spectra of DIV6520
